# Supplementary material
Source: Springer Nature journal article supplement (https://www.springermedizin.de/resource/supplementary/12889_2011_3763_MOESM4_ESM.pdf/9489740)

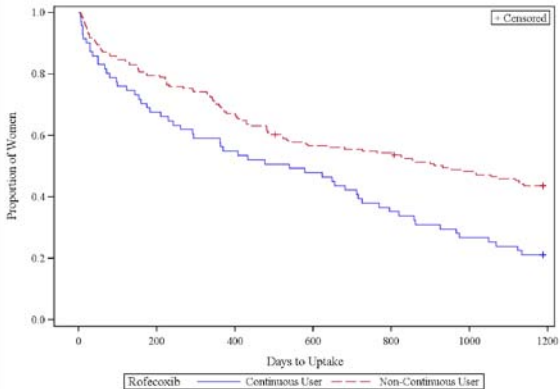

**(Log-rank Test: 0.001)**

Supplement: MOESM4 [file 9489740]
